# Supplementary material for: Identification of Hypermutation and Defective Mismatch Repair in ctDNA from Metastatic Prostate Cancer
Source: Oxford University Press journal article supplement (doi:10.1158/1078-0432.ccr-19-1623), 2019-11-19
Supplement: 10780432ccr191623-sup-222461_2_supp_5875913_q09sz9.pdf [file 10780432ccr191623-sup-222461_2_supp_5875913_q09sz9.pdf]

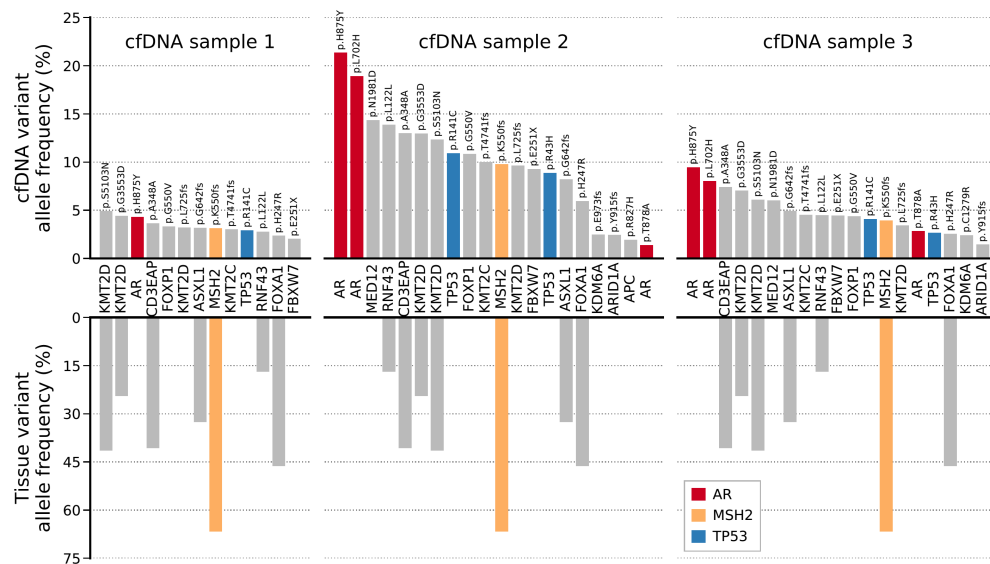

**Supplementary Figure 11. Mutation detection between primary tissue and later cfDNA collections in patient P09.** Mirror plot comparing the variant allele frequency (VAF) of mutations (horizontal axis) identified in either the cfDNA (top) or primary tissue biopsy specimen (bottom); each panel compares a different serial cfDNA sample (C1 = sample 1, C2 = sample 2, C3 = sample 3) to the same primary tissue. Key oncogenic genes are coloured, and protein changes are annotated.
